# Supplementary material for: Using death certificate data to study place of death in 9 European countries: opportunities and weaknesses
Source: PubMed Central journal article supplement (PMC2099436; doi:10.1186/1471-2458-7-283), 2007-10-08
Supplement: 1471-2458-7-283-S1.pdf [file 1471-2458-7-283-S1.pdf]

STROOK A

## AANGIFTE VAN OVERLIJDEN VAN EEN PERSOON VAN EEN JAAR OF OUDER

(Strook in te vullen door de **geneesheer** en te bewaren door het gemeentebestuur)

Naam en voornaam van de overledene

Echtgeno(o)t(e) of weduw(e)(naar) van

Gewone verblijfplaats : gemeente

straat, nr.

Datum (DDMMJJJJ) en uur (UUMM) van overlijden

 /  /   u  m

Adres van overlijden : gemeente

straat, nr

Nummer van de overlijdensakte

Geslacht van de overledene

 • mannelijk  • vrouwelijk  • onbepaaldGerechtelijk-geneeskundig bezwaar  
tegen begraving of crematie (1) ja  neenBezwaar tegen  
schenking van het lichaam (2) ja  neenVerplichte onmiddellijke kisting  
• in een hermetische kist (3) ja  neen

• in een gewone kist (4)

 ja  neenBezwaar tegen eventuele  
• crematie (5) ja  neen

• conserveringstechnieken (6)

 ja  neen

• vervoer zonder kist (7)

 ja  neenRisico voor blootstelling aan  
ioniserende stralen (3) ja  neen

Ik, die teken, geneesheer (naam, voornaam, nr. in Orde der geneesheren of RIZIV nummer),

.....  
verklaar dat ik de .....om.....uur heb vastgesteld dat de hierboven genoemde persoon overleden is.

Handtekening en stempel van de geneesheer

- (1) Overlijden zeker of vermoedelijk door uitwendige oorzaak (ongeval, zelfmoord, moord of doodslag).  
 (2) De overledene vormt een risico voor besmetting zoals bepaald sub (3).  
 (3) A. de overledene leed aan één van de volgende overdraagbare ziekten: cholera, miltvuur, pokken en andere orthopox virusziekten, virale hemorrhagische koorts.  
 B. de overledene vormt een risico op radioactieve besmetting (cfr. K.B. van 28 februari 1963 - B.S. 16 mei 1963 - art. 69.4, art. 69. 7 en art. 3).  
 (4) De overledene leed aan één van de volgende overdraagbare ziekten: AIDS, hondsdolheid, pest, virushepatitis (behalve bevestigde virushepatitis A).  
 (5) Prothesen die werken op lithiumbatterijen dienen verwijderd, alsook elke andere prothese die radio-elementen bevat.  
 (6) - cfr (2) en (3)  
 - slechte toestand van het lijk (ontbonden, verhakkeld)  
 - overlijden dat zeker of vermoedelijk aan een uitwendige oorzaak te wijten is.  
 (7) cfr (2) en (3)

STROOK B

STATISTISCH FORMULIER VOOR HET OVERLIJDEN VAN EEN PERSOON  
VAN EEN JAAR OF OUDER

(Strook in te vullen door de **geneesheer**, te verifiëren door het gemeentebestuur  
en over te maken aan de bevoegde geneesheer-ambtenaar)

## 1. Datum en uur van het overlijden

• datum (DDMMJJJJ)

 /  / 

• uur (UUMM)

 u  m

## 2. Plaats van het overlijden

 • thuis  • openbare weg • ziekenhuis  • werkplaats • bejaardentehuis • andere, precieseer .....

.....

.....

## 3. Geslacht van de overledene

 • mannelijk  • vrouwelijk  • onbepaald



PERSONNUMMER (CPR nummer)

Man Mand Woman Kvinde Stillborn DØDFØDT

For dødfødt angives moderens personnummer

FULDE NAVN = Full name

ERHVERV/Tidligere erhverv occupation

BOPÆL adresse, kommune, amt Address

DØDSSTED adresse, postnr. Address for place of death

hospital Sygehus, Plejehjem/beskyttet bolig, Eget hjem, other specification of other, Andet, Specificer:

FINDESTED hvis dødssted er ukendt = finding place if place of death is unknown

Date of death DØSDATO

Finding date if date of death is unknown FINDEDATO, hvis dødsdato er ukendt

Signs of death DØDSTEKN Rigor Livores Cadaverositas Maceratio Andet

A. UNDERTEGNEDE LÆGE

B. UNDERTEGNEDE LÆGE

Har den kl. synet liget af ovennævnte og forefundet de ovennævnte dødstegn.

Har den kl. synet liget af ovennævnte og forefundet de ovennævnte dødstegn.

Bekræfter, at der ikke foreligger tilknytningsforhold, som omhandlet i Justitsministeriets bekendtgørelse om lægers adgang til at konstatere dødens indtræden, foretage ligsyn, udstede dødsattest og foretage obduktion § 1.

Bekræfter, at der ikke foreligger tilknytningsforhold, som omhandlet i Justitsministeriets bekendtgørelse om lægers adgang til at konstatere dødens indtræden, foretage ligsyn, udstede dødsattest og foretage obduktion § 1.

Har ikke fundet omstændigheder af den i lov om ligsyn, obduktion og transplantation m.v. § 4 stk. 1 nævnte art, og der er efter mit skøn således ikke grund til mistanke om, at døden er forårsaget ved en forbrydelse, jf. Kirkeministeriets bekendtgørelse om begravelse og ligbrænding § 2 stk. 2,2. og 3. punktum.

Har fra politiet modtaget meddelelse om, at stedfunden indberetning efter lov om ligsyn, obduktion og transplantation m.v. § 4 stk. 1. ikke giver anledning til retslægelig ligsyn, og der er intet til hinder for, at ligbrænding kan finde sted, jf. Kirkeministeriets bekendtgørelse om begravelse og ligbrænding § 2 stk. 2,2. og 3. punktum.

Here is signed under normal circumstances

Here is signed if the sign physician has contacted the police e.g. in case of sudden unexpected death and the police has found no reason for further investigation

Dato Underskrift

Dato Underskrift

Lægens navn og adresse evt. stempel

Lægens navn og adresse evt. stempel

C. UNDERTEGNEDE EMBEDSLÆGE (RETSLÆGE)

D. POLITIETS PÅTEGNING

Har ved retslægeligt ligsyn den kl. forefundet dødstegn eller andre forhold der er uforenlige med livets beståen.

Det bekræftes i medfør af lov om ligsyn, obduktion og transplantation m.v. § 7 stk. 2., at der intet er til hinder for at liget begravnes, brændes eller - efter udstedelse af ligpas - føres ud af landet.

Bekræfter, at der ikke foreligger tilknytningsforhold, som omhandlet i Justitsministeriets bekendtgørelse om lægers adgang til at konstatere dødens indtræden, foretage ligsyn, udstede dødsattest og foretage obduktion § 1.

Here is signed by the coroner if a legal investigation has taken place

Here is signed by the police if a legal investigation has taken place

Dato Underskrift

Dato Underskrift

Embedslægens (retslægens) navn og adresse evt. stempel

Politiets stempel

0163028401

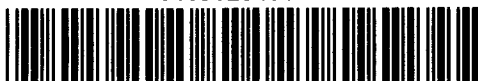

Vejledning: se bagsiden

# Dødsattest

henhold til lov nr. 402 af 13. juni 1990 om ligsyn, obduktion og transplantation m.v.

PERSONNUMMER (CPR nummer)

*Maria Leonora Skibore*  
Mand Kvinde DØDFØDT

For dødfødt angives moderens personnummer

FULDE NAVN *Maria*

Tidsinterval mellem sygdommens eller skadens opståen og dødens indtræden

DØDSÅRSAG I Det sygdoms- og skadesforløb som førte til døden: *cause of death*  
den umiddelbare dødsårsag var

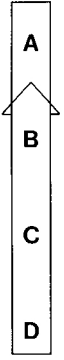

*Immediate cause*  
som var en følge af *which was a result of*

som var en følge af

som igen var en følge af (den tilgrundliggende lidelse)

DØDSÅRSAG II Andre væsentlige sygdomme, misbrug eller skader, der kan have medvirket til dødens indtræden. Ved misbrug angives misbrugets art.

*factors that may have participated in causing death*

DØDSMÅDEN

Naturlig død  
*natural death*

Ulykke  
*accident*

Selv mord  
*suicide*

Drab/Vold  
*hitting/violence*

Uoplyst  
*unknown*

OPERATION FORETAGET

I bekræftende fald, for hvilken lidelse:

*operation*  
*sudden cardiac death*

OBDUKTION  
*autopsi*

- retslig
- anden
- forbud
- ingen

Hvis yderligere undersøgelser - specificer hvilke:  
*Legal*  
*other prohibition*  
*none*

ja  
nej

Operationens art:  
Operationsdato:

Supplerende oplysninger:

*Other information*

Vejledning: se bagsiden

Det retslægelige ligsyn har fundet sted i forbindelse med (politiets repræsentant stilling, navn og tjenestested)

*Signature of physician*  
Dato Lægens underskrift (skal altid udfyldes)

Lægens navn og adresse evt. stempel

Væsentlige obduktionsfund

Underskrift (af den læge der har påført obduktionsfundene)

0163028402

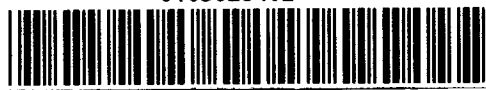

Cognome e nome del defunto

Età 72

ISTAT

Istituto nazionale di statistica

2001 D4 - Ediz. 2001  
COPIA PER I.A.S.L.

SCHEDA DI MORTE OLTRE IL 1° ANNO DI VITA PER MASCHIO

PARTE A - A CURA DEL MEDICO

N.B. Per questo segno da barrare: X, quello corrispondente al caso.

PROVINCIA DI ... COMUNE DI ...  
LUOGO DEL DECESSO ...  
RISCONTRO DIAGNOSTICO  
di DECESSO ...  
Ritorno di cura ...

Table with 5 columns: I, II, III, E, and a row for 'Ritorno all'ISTAT'.

MORTE DA CAUSA VIOLENTA

1. Causa iniziale (Scegliere in alternativa)  
Indicare la malattia che, attraverso eventuali complicazioni o stati morbose riferibili ad indicatori di cui ha condotto alla causa terminale, dà origine all'1.3.

anni \_\_\_\_\_  
mesi \_\_\_\_\_  
giorni \_\_\_\_\_

2. Cause violente  
Accidente \_\_\_\_\_  
Suicidio sul lavoro \_\_\_\_\_  
Omicidio \_\_\_\_\_

3. Studi medici preesistenti che hanno eventualmente contribuito al decesso (Scegliere in alternativa)

3. Causa intermedia o complicazione (Scegliere in alternativa)  
Indicare l'eventuale complicazione o eccezione morbida della malattia indicata all'1.1.

anni \_\_\_\_\_  
mesi \_\_\_\_\_  
giorni \_\_\_\_\_

4. Altri stati morbosi rilevanti (Scegliere in alternativa)  
Indicare le eventuali malattie o gli stati morbosi che hanno contribuito al decesso ma senza rapporto con le cause indicate all'1.1, 2, e 3.

anni \_\_\_\_\_  
mesi \_\_\_\_\_  
giorni \_\_\_\_\_

7. Data e ora della morte

Indicare data e orario del decesso e dell'ora della morte

PARTE B - NOTIZIE A CURA DELL'UFFICIALE DI STATO CIVILE (CONTROLLARE EVENTUALMENTE CORRISPONDENZE E COMPATIBILITÀ CON IL MODULO DEI DENUNTI)

N.B. Per questo segno da barrare: X, quello corrispondente al caso.  
ALTO DI MORTE  
Materno \_\_\_\_\_  
Paterno \_\_\_\_\_  
Seme \_\_\_\_\_  
UFFICIO DI STATO CIVILE  
CIRCONDSCRIZIONE \_\_\_\_\_

PROVINCIA ... COGNOME ...  
NOME ...  
RESIDENZA ...

6. Professione

1. Data di morte

2. Data di nascita

3. Località di nascita  
Spazio comune di nascita  
Altro comune \_\_\_\_\_  
Spazio comune di nascita \_\_\_\_\_  
Stato estero \_\_\_\_\_

4. Età compiuta  
Anni \_\_\_\_\_

5. Stato civile  
Celibe \_\_\_\_\_  
Coniugato \_\_\_\_\_  
Vedovo \_\_\_\_\_  
Divorziato o già coniugato (di) \_\_\_\_\_  
Separato legalmente \_\_\_\_\_  
Se coniugato o separato legalmente indicare:  
Tasso di nascita (di) \_\_\_\_\_  
Cognome sposato \_\_\_\_\_  
Tasso di matrimonio \_\_\_\_\_

6. Residenza  
Causale comune di morte \_\_\_\_\_  
Altra comune \_\_\_\_\_  
Spazio estero \_\_\_\_\_  
Indicare la comune di nascita \_\_\_\_\_  
Spazio estero \_\_\_\_\_

7. Qualità di abitazione  
Lettate \_\_\_\_\_  
Doppio appartamento e comune civile \_\_\_\_\_  
Doppio di abitazione senza comune civile \_\_\_\_\_  
Lettate in comune civile \_\_\_\_\_  
Lettate in comune civile e comune civile \_\_\_\_\_

8. Condizione professionale o non professionale  
Dirigente \_\_\_\_\_  
Disoccupato \_\_\_\_\_  
In cerca di prima occupazione \_\_\_\_\_  
Ritirato (ex lavoro) \_\_\_\_\_  
Studente \_\_\_\_\_  
Lavoro all'estero \_\_\_\_\_  
Altro (compreso servizio di leva o servizio civile) \_\_\_\_\_

9. Relazione nella professione  
Per incarico ad interim \_\_\_\_\_  
Imprenditore o loro collaboratore \_\_\_\_\_  
Lavoratore in proprio o collaboratore \_\_\_\_\_  
Altro \_\_\_\_\_  
Per lavoratori dipendenti \_\_\_\_\_  
Dirigente o dirigente \_\_\_\_\_  
Impiegato o ritenuto \_\_\_\_\_  
Operario o assistente \_\_\_\_\_  
Altro (compreso, tra gli operai, ecc.) \_\_\_\_\_

10. Cause di decesso  
Aggravato, crollo e rottura \_\_\_\_\_  
Infarto \_\_\_\_\_  
Cervello, fido del cuore, aneurisma \_\_\_\_\_  
Tubercolosi ematogene e tubercolosi \_\_\_\_\_  
Altra (specificare, tra gli operai, ecc.) \_\_\_\_\_

11. Cause di decesso  
Battuto \_\_\_\_\_  
Per azione \_\_\_\_\_  
Altra (specificare) \_\_\_\_\_

12. Cause di decesso  
Causa di decesso \_\_\_\_\_  
Altra (specificare) \_\_\_\_\_

# B Doodsoorzaakverklaring

Ministeriële beschikking van 25 april 2002 (Staatscourant 86) ingevolge artikel 12A van de Wet op de lijkbezorging. De Inspecteur-Generaal voor de Gezondheidszorg is belast met het toezicht op de naleving van de invullingsplicht.

*Naam van de overledene niet vermelden*

## a Gemeente van overlijden

### Plaats van overlijden

- |                                                   |                                   |
|---------------------------------------------------|-----------------------------------|
| <input type="checkbox"/> ziekenhuis               |                                   |
| <input type="checkbox"/> psychiatrisch ziekenhuis |                                   |
| <input type="checkbox"/> verpleeghuis             | <input type="checkbox"/> thuis    |
| <input type="checkbox"/> verzorgingshuis          | <input type="checkbox"/> elders   |
| <input type="checkbox"/> overige instellingen     | <input type="checkbox"/> onbekend |

## Specimen

## b Sectie

- vindt niet plaats  
 is verricht  
 wordt nog verricht  
 onbekend

### Onderzoekingen

Welke onderzoekingen, al dan niet postmortaal, zijn/worden verricht?

*(bijv. histologisch of microbiologisch onderzoek)*

## c Geslacht

- mannelijk  
 vrouwelijk

### Leeftijd

- 28 dagen of ouder

geboortedatum  
 dag mnd. jaar

overlijdensdatum  
 dag mnd. jaar

- jonger dan 28 dagen

geboortedatum geboortetijd  
 dag mnd. jaar uur min.

overlijdensdatum overlijdenstijd  
 dag mnd. jaar uur min.

duur zwangerschap  
 weken

geboortegewicht  
 gram

lengte  
 cm

## d Natuurlijke dood *(zie toelichting ommezijde)*

1a Ziekte die **rechtstreeks** de dood tot gevolg had

duur tussen begin ziekte en overlijden



1b Ziekten die hebben geleid tot de doodsoorzaak onder a.  
 + Bij vermelding van meerdere ziekten de aan het overlijden  
 c ten grondslag liggende ziekte onder c opgeven.

b veroorzaakt door/gevolg van

duur tussen begin ziekte en overlijden



c veroorzaakt door/gevolg van

duur tussen begin ziekte en overlijden



2 Bijkomstige, bij overlijden nog bestaande ziekten en bijzonderheden die tot de dood hebben bijgedragen, doch niet met de onder 1 genoemde ziekten in causaal verband staan.

duur tussen begin ziekte en overlijden



## e Niet-natuurlijke dood, incl. levensbeëindigend handelen

- Oorzaak  zelfdoding  ongeval  
 misdrijf  onbekend of anders

Omstandigheden die tot de niet-natuurlijke dood hebben geleid

*(bijv. bromfietser door auto aangereden, van trap gevallen, overboord geslagen bij aanvaring, bij stofzuigen door elektrische stroom getroffen, bij grondwerk door zand bedolven, vergiftiging)*

Aard van het letsel

*(bijv. schedelbasisfractuur, borstkas ingedrukt)*

Plaats van de gebeurtenis

*(bijv. thuis, in fabriek of op werkplaats, op straat, aan boord, op het land, aan het strand)*

### Levensbeëindigend handelen

*(hiermee wordt niet bedoeld staken of niet-instellen van levensverlengende handelingen, noch pijnbestrijding met als neveneffect eerder overlijden)*

- euthanasie  
*(toedienen van middel met uitdrukkelijk doel patiënt te laten overlijden op verzoek patiënt)*  
 hulp bij zelfdoding  
*(verstrekken of voorschrijven van middel met uitdrukkelijk doel patiënt te laten overlijden op verzoek patiënt)*  
 anders

Wat was de onderliggende ziekte?

*(zie toelichting ommezijde)*

duur tussen begin ziekte en overlijden



deze ruimte niet beschrijven s.v.p.



## Specimen

Aangifte is verplicht voor een na een zwangerschapsduur van tenminste 24 weken ter wereld gekomen vrucht (art. 2 en art. 12A van de Wet op de lijkbezorging van 22 mei 1991).

Definitie doodgeborene: de na een zwangerschapsduur van tenminste 24 weken ter wereld gekomen vrucht, welke na de geboorte geen enkel teken van levensverrichting heeft vertoond.

mannelijk

vrouwelijk

duur zwangerschap  
weken

geboortegewicht  
gram

datum partus

Doodsoorzaak

Eventuele complicaties tijdens zwangerschap of bevalling

### g Opmerkingen

Deze ruimte is bestemd voor vermelding van eventuele bijzonderheden die nog niet eerder zijn vermeld (lokalisatie en/of histologie van een gezwel, indicatie voor een diagnostische of operatieve ingreep) en verder elke toelichting die van belang kan zijn voor een zo nauwkeurig mogelijke rubricering van de doodsoorzaak, zoals een partus of abortus binnen de 365 dagen voorafgaand aan het overlijden.

### h Naam en correspondentie-adres van de geneeskundige die het formulier invult

naam

eventueel  
naam  
instelling

specialisme

straat +  
nummer

postcode

plaats

Als:

- behandelend geneeskundige
- gemeentelijk lijkschouwer
- geneeskundige aangewezen door de Officier van Justitie
- waarnemer

N.B. Ingeval deze doodsoorzaakverklaring niet is afgegeven door de behandelend geneeskundige, hieronder diens personalia vermelden.

naam

eventueel  
naam  
instelling

specialisme

straat +  
nummer

postcode

plaats

handtekening

datum

### Toelichting (zie ook [www.cbs.nl/doodsoorzaakverklaring](http://www.cbs.nl/doodsoorzaakverklaring))

#### vraag d

In het geval van een natuurlijke dood, dient u onder 1a de ziekte te vermelden die rechtstreeks de dood tot gevolg had. Onder 1b en 1c dienen de ziekten te worden vermeld die hebben geleid tot de onder 1a genoemde doodsoorzaak. Het onderliggend lijden dient het laatst, onder 1c, te worden vermeld. Termen die symptomen aanduiden (bijv. astma cardiale, insufficiëntia cordis, verlamming, enz.) dienen in ieder geval bij het onderliggend lijden zoveel mogelijk te worden vermeden. Indien u de noodzaak daartoe toch aanwezig acht, gelieve u daarvan een omschrijving te geven onder g.

Voorbeeld 1

1a LONGEMBOLIE

b OPERATIE VOOR PANCREATITIS

c

2 MYODEGENERATIO CORDIS

Voorbeeld 2

1a LEVERINSUFFICIËNTIE

b LEVERMETASTASEN

c MAAGCARCINOOM

2 ZIEKTE VAN PARKINSON

Voorbeeld 3

1a UREMIE

b URINERETENTIE

c HYPERPLASIE PROSTAAT

2 DIABETES MELLITUS

Voorbeeld 4

euthanasie

LONGCARCINOOM

deze ruimte niet beschrijven s.v.p.

# Legeerklæring om dødsfall/melding om unaturlig dødsfall

Jfr. lov om leger av 13.06.1980 §§ 40 og 41.

Blanketten fylles ut i samarbeid med rettsmedisken på side 2 og leveres rettsmedisken (den som har tilrettelagt melding om dødsfall) i henholdsvis politistasjon, i kommunedirektoratet eller i kirkens kirkekontor på dødsstedet. Kopier av legererklæringen sendes den lokale politimyndighet, hvis dødsfallet kan være usædvanlig. (Se rettsmelding på side 2.)

|                                                                                                                                                                                        |                                                                                                                                                                                                                     |                                                                     |                        |        |                                     |
|----------------------------------------------------------------------------------------------------------------------------------------------------------------------------------------|---------------------------------------------------------------------------------------------------------------------------------------------------------------------------------------------------------------------|---------------------------------------------------------------------|------------------------|--------|-------------------------------------|
| Dødsårsak (ekte navn, fjernt og mellomnavn)                                                                                                                                            |                                                                                                                                                                                                                     | Kjenn                                                               | Fødselsnr. (11 siffer) |        | Fyller ut av Statistisk Sentralbyrå |
| Barnetid, kommune                                                                                                                                                                      | Gate og husnr.                                                                                                                                                                                                      | Parti nr. og parti nr.-d                                            |                        |        |                                     |
| Dødssted, kommune                                                                                                                                                                      | Død skjedde for (hus) i<br><input type="checkbox"/> Hjemmet <input type="checkbox"/> Annet sted <input type="checkbox"/> Under transport til sykehus <input type="checkbox"/> Død i sykehus eller annen institusjon |                                                                     |                        |        |                                     |
| For dødsårsak eller annen årsak for (hus) i for (hus) i kommune nr.                                                                                                                    |                                                                                                                                                                                                                     |                                                                     |                        |        | Død (fag. med. dr.)                 |
| Hvis sykdomsforløp, for annen institusjon type for (hus) i                                                                                                                             |                                                                                                                                                                                                                     |                                                                     |                        |        |                                     |
| Yrke (sagt, eventuelt fagoppgaver)                                                                                                                                                     |                                                                                                                                                                                                                     |                                                                     |                        |        |                                     |
| Ektekvalifikasjon<br><input type="checkbox"/> Ugift <input type="checkbox"/> Gift <input type="checkbox"/> Enke-/mann <input type="checkbox"/> Skilt <input type="checkbox"/> Separert |                                                                                                                                                                                                                     | For barn døde innen 24 timer etter fødselen, lever lunge vekt i kg? |                        | Tilsvr | Hilsener                            |
| Hvis en annen på den lokale har bekreftet dødsårsaken sykdom                                                                                                                           |                                                                                                                                                                                                                     |                                                                     |                        |        |                                     |

## Opplysning om dødsårsaken Alle rubrikker må fylles ut. (Se rettleiing på baksiden.)

|                                                                                                                                                                                                                                                                                                                                                                                                                                                 |    |  |                                           |
|-------------------------------------------------------------------------------------------------------------------------------------------------------------------------------------------------------------------------------------------------------------------------------------------------------------------------------------------------------------------------------------------------------------------------------------------------|----|--|-------------------------------------------|
| <p>I. Sykdom eller tilstand som direkte (med dødsfall) har ført til døden.<br/>(Hvis det ikke fremgår av dødsattest, kjortel, kjortelmannskriv, uttale, men den sykdom, røde eller kampthorjon som med dødsfall framkaller døden.)</p> <p>Oppgi den eller de sykkelige tilstander, røde eller andre dødsårsaker som har ført til (dødsfall) den dødsårsaken som er angitt ovenfor. Den tilstand som ledet til sykdomsforløpet er i tillegg.</p> | a) |  | Omvendt til medlem sykdomsforløp og døden |
|                                                                                                                                                                                                                                                                                                                                                                                                                                                 | b) |  |                                           |
|                                                                                                                                                                                                                                                                                                                                                                                                                                                 | c) |  |                                           |

|                                                                                                                                                                                  |  |
|----------------------------------------------------------------------------------------------------------------------------------------------------------------------------------|--|
| <p>II. Andre usædvanlige tilstander som kan ha ledet til dødsfall som dødsårsaken, men som ikke er til direkte årsak til døden sykdom eller tilstand som har ført til døden.</p> |  |
|----------------------------------------------------------------------------------------------------------------------------------------------------------------------------------|--|

|                                                   |                               |                                                                                    |                                                                         |
|---------------------------------------------------|-------------------------------|------------------------------------------------------------------------------------|-------------------------------------------------------------------------|
| Dødsårsaken sykdom (sykdom) eller følger av døden | Dødsårsaken (sykdom) (sykdom) | Sted<br><input type="checkbox"/> I ved hjemmet <input type="checkbox"/> Annet sted | Yrkesulykke<br><input type="checkbox"/> Ja <input type="checkbox"/> Nei |
|                                                   | Hvordan skjedde ulykken       |                                                                                    |                                                                         |

Spesielle merknader til melding om dødsfall (uten å skrive ut på (satt leger))

Drog  Selvmord  Miskred av vaskeløs  Medisinsk feil  Ukjent årsak  Plutselig dødsfall  Dødsfall i arbeidstid  Ukjent til  Yrkesulykke

|                                                                                          |             |            |
|------------------------------------------------------------------------------------------|-------------|------------|
| Ble det foretatt opplysning?<br><input type="checkbox"/> Ja <input type="checkbox"/> Nei | Dødsårsaken | Fødselsnr. |
|------------------------------------------------------------------------------------------|-------------|------------|

|                                                                                                                                                                |                                                                                                                                            |
|----------------------------------------------------------------------------------------------------------------------------------------------------------------|--------------------------------------------------------------------------------------------------------------------------------------------|
| Opplysninger under på forhånd bygges på<br><input type="checkbox"/> Obduksjon <input type="checkbox"/> Under for døden <input type="checkbox"/> Syning av blod | Vil den oppgitte dødsårsaken være til nytte?<br><input type="checkbox"/> Ja <input type="checkbox"/> Nei <input type="checkbox"/> Ved ikke |
|----------------------------------------------------------------------------------------------------------------------------------------------------------------|--------------------------------------------------------------------------------------------------------------------------------------------|

|                                                                                                                                                                                                    |                                                                                                                                                       |
|----------------------------------------------------------------------------------------------------------------------------------------------------------------------------------------------------|-------------------------------------------------------------------------------------------------------------------------------------------------------|
| Undertegnete lege som har utøvet funksjon som har ledet til døden, under for til sykdom (satt av lege), erklærer hermed at dødsårsaken er den som er angitt ovenfor.<br><input type="checkbox"/>   | Melding om usædvanlig dødsfall er sendt til myndighet til politisk eller annen myndighet.<br><input type="checkbox"/> Ja <input type="checkbox"/> Nei |
| Undertegnete lege erklærer hermed at det ikke er grunn til å anta at døden er valdt ved en urettferdig handling. (Erklæringen gir ikke uttrykk for at det er eller ikke er en kriminell handling.) |                                                                                                                                                       |
| Date _____ Lege _____<br>Adresse: _____                                                                                                                                                            | Date _____ Lege _____<br>Adresse: _____                                                                                                               |

|                                                                                                                                                    |                                                                                                                                                     |                                   |
|----------------------------------------------------------------------------------------------------------------------------------------------------|-----------------------------------------------------------------------------------------------------------------------------------------------------|-----------------------------------|
| I. Fersvitt biforskrift av en annen lege under den offentlige lege på dødsstedet<br>Date _____ For skriftforfatterens navn _____<br>Adresse: _____ | II. Fersvitt biforskrift av en annen lege under den offentlige lege på dødsstedet<br>Date _____ For skriftforfatterens navn _____<br>Adresse: _____ | III. OK. Inngitt for (f. temp. d) |
|----------------------------------------------------------------------------------------------------------------------------------------------------|-----------------------------------------------------------------------------------------------------------------------------------------------------|-----------------------------------|

Var dödsorsaksintyget utfärdas (klinik, mottagning etc. samt adress, telefonnr och ev. telefaxnr) ❶

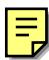

# DÖDSORSAKSINTYG

Personuppgifter (efter- och förnamn, adress) ❶ ❷

Den avlidnes personnummer (12 siffror) ❸

För barn under 7 dygn anges ålder

Dödfött  Under 24 tim  24 tim t.o.m. 6 dygn

Dödsdatum

Datum (8 siffror) år, mån, dag Klockslag (t.ex. 06:20)

Säkert  Sannolikt

Typ av dödsplats ❹

Akutsjukhus  Sjukhem eller annan vårdbostad  Privat bostad  Annan/okänd

## LÄKARENS UTLÅTANDE OM DÖDSORSAKEN

Intyget ersätter ett tidigare utfärdat

### I Det sjukdoms- eller skadeförlopp som lett till döden ❶

Den terminala dödsorsaken var

A

Ungefärlig debut eller varaktighet

som var en följd av

B

Ungefärlig debut eller varaktighet

som i sin tur var en följd av

C

Ungefärlig debut eller varaktighet

som i sin tur var en följd av

D

Ungefärlig debut eller varaktighet

### II Andra sjukdomar och skador som bidragit till dödsfallet (ange även ungefärlig debut eller varaktighet) ❷

Dödsorsaksuppgifterna grundas på

Klinisk obduktion ❸  Undersökning före döden  Yttre likbesiktning  Rättsmedicinsk obduktion  Rättsmedicinsk likbesiktning

Opererad inom 4 veckor före döden ❹

Operationsdatum (8 siffror)

Tillstånd som föranledde ingreppet

Ja  Nej  Uppgift saknas

Vid missbruksrelaterat dödsfall, ange typ av drog/droger ❺

Alkohol  Läkemedel  Narkotika  Annat, ange vad:

Vid skada/förgiftning, ange orsak och eventuell avsikt ❻

Datum för skada/förgiftning

Olycksfall  Avsiktligt självtillfogad  Avsiktligt tillfogad av annan  Oklart om avsikt förelegat

Kort beskrivning av hur skadan/förgiftningen uppkommit ❼

Plats för skadehändelsen ❽

Bostad/bostadsområde  Skola, offentlig lokal, institutionsområde  Idrotts-/motionsanläggning  Gata/väg  Lantbruk/industriområde  Annan/okänd

Aktivitet vid skadetillfället

Idrott/motion  Fritidsverksamhet/lek  Förvärsarbete  Utbildning  Annan/okänd

## UNDERSKRIFT AV UTFÄRDANDE LÄKARE

|               |                                |                       |            |
|---------------|--------------------------------|-----------------------|------------|
| Ort           | Datum (8 siffror) år, mån, dag | Läkarens namnteckning |            |
| Tjänsteställe | Telefonnr (inkl. riktnr)       | Namnförtydligande     | Befattning |

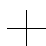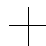

## Hur man fyller i blanketten

- ① För klinik- och personuppgifter kan tydliga avtryck med stämpelbrickor godtas.
  - ② För dödfött barn eller barn som avlidit inom 28 dygn efter födseln skall inte stämpelbricka användas. Ange kön och eventuellt namn. Ange dessutom moderns personnummer, namn och adress.
  - ③ Den avlidnes personnummer måste fyllas i, även för barn som avlidit inom 28 dygn efter födseln. Ange födelsedatum, om personnummer inte finns.
  - ④ Typ av dödsplats
    - Akutsjukhus: sjukhus för somatisk eller psykiatrisk korttidsvård
    - Sjukhem eller annan vårdbostad: innefattar äldrebostäder och servicehus med tillgång till vård- och omsorgspersonal, gruppboenden, gruppboendestäder, institutioner etc.
    - Privat bostad: utesluter sådant eget boende som ingår i föregående kategori.
- ① Uppgifter om dödsorsak används huvudsakligen i medicinsk forskning. Ange därför diagnosen så specifikt som möjligt. Undvik förkortningar. Skriv inte kodnummer. Uppgifter om debut eller varaktighet är mycket väsentliga för en korrekt klassificering av dödsorsaken.

Ange för

- tumör: malign, benign samt primärtumörens läge,
- diabetes mellitus: typ och komplikationer,
- njursjukdomar: komplikationer (t.ex. hypertoni), etiologi till njursvikt.

Ange det sjukdoms- eller skadeförlopp som haft störst betydelse för dödsfallet. Skriv *en* diagnos per rad och ange debut eller varaktighet.

Om förloppet kan beskrivas med en enda diagnos anges denna på rad A. Rad B–D lämnas då tomma. Krävs flera diagnoser för att beskriva förloppet skrivs den terminala dödsorsaken på rad A. Det eller de tillstånd som ledde fram till den terminala dödsorsaken skrivs på raderna nedanför. Det tillstånd som inledde förloppet skrivs nederst, så att det bildas en kedja av orsaker och komplikationer från det inledande tillståndet på den nedersta raden upp till den terminala dödsorsaken på rad A. Akuta patologiska förlopp kan ingå i en sådan kedja men också att ett tidigare tillstånd berett vägen för ett senare, t.ex. genom vävnadsskador eller funktionsnedsättning.

För hjärtsvikt och lunginflammation anges eventuella bakomliggande tillstånd, t.ex.

- rad A: hjärtsvikt; rad B: lårbensbrott,
- rad A: lunginflammation; rad B: influensa.

Socialstyrelsen begär ofta komplettering av dödsorsaksintyg som verkar ofullständigt ifyllda. Ange därför tydligt om någon uppgift inte kan lämnas, t.ex.

- rad A: hjärtsvikt, rad B: okänt (patienten avböjde utredning).

- ② Sjukdomarna anges i rangordning efter den betydelse de haft för dödsfallet, med den allvarigaste sjukdomen först. Ange tillståndens debut eller varaktighet inom parentes efter varje diagnos.
- ③ Om obduktion görs, fylls inte uppgifterna om dödsorsaken i förrän obduktionsresultatet föreligger.
- ④ Som operation räknas åtgärder enligt Socialstyrelsens "Klassifikation av kirurgiska åtgärder 1997".
- ⑤ Ett dödsfall anses vara missbruksrelaterat om drogmissbruk uppenbarligen framkallat eller bidragit till dödsfallet, t.ex. genom akut förgiftning, beteenderubbningar eller långtidsskador.

Vid missbruk av narkotiska läkemedel upptagna i FASS väljs alternativet "läkemedel". Vid missbruk av preparat som normalt inte har medicinsk användning, t.ex. amfetamin, väljs alternativet "narkotika". Flera rutor kan fyllas i, t.ex. vid blandmissbruk.

- ⑥ Välj det alternativ som är mest sannolikt även om omständigheterna inte är klarlagda. Alternativet "Oklart om avsikt förelegat" väljs endast om man inte kan avgöra om olycksfall eller avsiktligt tillfogad skada är det mest sannolika uppkomst sättet.
- ⑦ Ange för
  - trafikolycka: om den döde var t.ex. förare, passagerare eller fotgängare och vilka typer av fordon som var inblandade (personbil, lastbil, motorcykel etc.),
  - förgiftning: vilken eller vilka substanser,
  - fall: t.ex. i trappa, från stege, halkat på mattkant,
  - drunkning: naturlig eller konstgjord vattensamling (t.ex. vattendrag, sjö, brunn, badkar), fall ned i vatten (t.ex. genom brunnslock) eller på annat sätt (fått kramp under simtur).
- ⑧ För definition av plats och aktivitet vid skadetillfället hänvisas till avsnitten om plats- och aktivitetskoder i "Kapitel XX" i Socialstyrelsens "Klassifikationer av sjukdomar och hälsoproblem 1997".

## Information

I begravningslagen (1990:1144), begravningsförordningen (1990:1147) och i Socialstyrelsens föreskrifter och allmänna råd (SOSFS 1996:29) Vissa åtgärder inom hälso- och sjukvården vid dödsfall finns bestämmelser om vilka åtgärder som skall vidtas vid dödsfall.

Den läkare som har utfärdat dödsbeviset skall även ansvara för att dödsorsaksintyget utfärdas. När den läkare som har utfärdat dödsbeviset begär det, är den läkare som har vårdat den avlidne för den sjukdom eller det tillstånd som ledde till dödsfallet skyldig att utfärda dödsorsaksintyget (16 § begravningsförordningen). Den läkare som utfärdar dödsorsaksintyget får inte vara make, barn, förälder, syskon eller på något annat sätt närstående till den avlidne (4 kap. 2 § begravningslagen).

Dödsorsaksintyget skall sändas in till **Dödsorsaksstatistiken, Socialstyrelsen, 106 30 Stockholm, inom tre veckor** från det att dödsbeviset utfärdades. Om tidsgränsen tre veckor undantagsvis behöver överskridas, skall Socialstyrelsen skriftligen underrättas om förseningen och skälen för denna (16 § begravningsförordningen).

Den läkare som har utfärdat dödsorsaksintyget skall behålla en tydligt läsbar kopia av handlingen. Kopian skall behandlas som en journalhandling (SOSFS 1996:29, avsnitt 4.3, jämförd med 5 § patientjournalagen (1985:562)).

Om en rättsmedicinsk undersökning har gjorts, svarar Rättsmedicinalverket för att dödsorsaksintyget utfärdas och sänds in (16 § begravningsförordningen).

Om polismyndigheten beslutar att någon rättsmedicinsk undersökning inte skall göras, skall myndigheten underrätta den läkare som har lämnat dödsbeviset om detta (4 kap. 4 § begravningslagen). Den läkare som har lämnat dödsbeviset ansvarar då för att dödsorsaksintyget utfärdas och kan från polisen få sådana uppgifter som behövs för intyget, t.ex. uppgifter om omständigheterna vid dödsfallet (SOSFS 1996:29, avsnitt 9.3).

**CERTIFIED COPY**  
Pursuant to the Births and

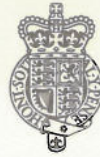

**OF AN ENTRY**  
Deaths Registration Act 1953

| <b>DEATH</b>                                                                                        |  | Entry No.                                  |
|-----------------------------------------------------------------------------------------------------|--|--------------------------------------------|
| Registration district                                                                               |  | Administrative area                        |
| Sub-district                                                                                        |  |                                            |
| 1. Date and place of death                                                                          |  |                                            |
| 2. Name and surname                                                                                 |  | 3. Sex                                     |
|                                                                                                     |  | 4. Maiden surname of woman who has married |
| 5. Date and place of birth                                                                          |  |                                            |
| 6. Occupation and usual address                                                                     |  |                                            |
| 7.(a) Name and surname of informant                                                                 |  | (b) Qualification                          |
| (c) Usual address                                                                                   |  |                                            |
| 8. I certify that the particulars given by me above are true to the best of my knowledge and belief |  | Signature of informant                     |
| 9. Cause of death                                                                                   |  |                                            |
| 10. Date of registration                                                                            |  | 11. Signature of registrar                 |

SPECIMEN

Certified to be a true copy of an entry in a register in my custody.

SPECIMEN

\*Superintendent Registrar  
\*Registrar

Date

*\*Strike out whichever does not apply*

**SCHEDULE 2**

**Regulation 3**

**Medical certificate of cause of death**

(Section 24(1) of the Registration of Births, Deaths, and Marriages (Scotland) Act 1965)

**Form 11**  
F(11)000001

The completed certificate is to be taken to the Registrar of Births, Deaths and Marriages

|                                    |       |
|------------------------------------|-------|
| <b>For registration office use</b> |       |
| Year:                              | _____ |
| RD number:                         | _____ |
| Entry number:                      | _____ |

|                         |                                                                                              |       |      |      |        |
|-------------------------|----------------------------------------------------------------------------------------------|-------|------|------|--------|
| <b>Name of deceased</b> |                                                                                              |       |      |      |        |
| Date of death           | Day                                                                                          | Month | Year |      |        |
|                         |                                                                                              |       |      |      |        |
| Place of death          | Time of death                                                                                |       |      | Hour | Minute |
|                         | Fill in an approximate time if you do not know the exact time (Please use the 24-hour clock) |       |      |      |        |

|                                                                                                       |                                                                                                                                                                           |                                                 |
|-------------------------------------------------------------------------------------------------------|---------------------------------------------------------------------------------------------------------------------------------------------------------------------------|-------------------------------------------------|
| <b>Cause of death</b>                                                                                 |                                                                                                                                                                           | Approximate interval<br>between onset and death |
| I hereby certify that to the best of my knowledge and belief, the cause of death was as stated below: |                                                                                                                                                                           | Years Months Days                               |
| <b>I</b>                                                                                              | Disease or condition directly leading to death* (a) _____<br>due to (or as a consequence of)                                                                              |                                                 |
|                                                                                                       | <b>Antecedent causes</b><br>Morbid conditions, if any, giving rise to the above cause, stating the underlying condition last (b) _____<br>due to (or as a consequence of) |                                                 |
|                                                                                                       | (c) _____<br>due to (or as a consequence of)                                                                                                                              |                                                 |
|                                                                                                       | (d) _____<br>due to (or as a consequence of)                                                                                                                              |                                                 |
| <b>II</b>                                                                                             | Other significant conditions contributing to the death, but not related to the disease or condition causing it _____                                                      |                                                 |
|                                                                                                       | _____                                                                                                                                                                     |                                                 |

\* This does not mean mode of dying, such as heart or respiratory failure; it means the disease, injury or complication that caused death.

|                                                                                                                   |                                                                                                                                                           |
|-------------------------------------------------------------------------------------------------------------------|-----------------------------------------------------------------------------------------------------------------------------------------------------------|
| <b>Please tick the relevant box</b>                                                                               |                                                                                                                                                           |
| <b>Post mortem</b>                                                                                                |                                                                                                                                                           |
| <b>PM1</b> <input type="checkbox"/> Post mortem has been done and information or is included above                | <b>Attendance on deceased</b>                                                                                                                             |
| <b>PM2</b> <input type="checkbox"/> Post mortem information may be available later or                             | <b>A1</b> <input type="checkbox"/> I was in attendance upon the deceased during last illness                                                              |
| <b>PM3</b> <input type="checkbox"/> No post mortem is being done                                                  | <b>A2</b> <input type="checkbox"/> I was not in attendance upon the deceased during last illness: the doctor who was is unable to provide the certificate |
| <b>Procurator fiscal</b>                                                                                          | <b>A3</b> <input type="checkbox"/> No doctor was in attendance on the deceased                                                                            |
| <b>PF</b> <input type="checkbox"/> This death has been reported to the procurator fiscal                          | <b>Maternal deaths</b>                                                                                                                                    |
| <b>Extra information for statistical purposes</b>                                                                 | <b>M1</b> <input type="checkbox"/> Death during pregnancy or within 42 days of the pregnancy ending                                                       |
| <b>X</b> <input type="checkbox"/> I may later be able to supply the Registrar General with additional information | <b>M2</b> <input type="checkbox"/> Death between 43 days and 12 months after the end of pregnancy                                                         |

|                               |                                                                                                      |
|-------------------------------|------------------------------------------------------------------------------------------------------|
| Signature: _____              | Date: _____                                                                                          |
| Name in BLOCK CAPITALS: _____ | Registered medical qualifications _____                                                              |
| Official address: _____       | <b>For a death in hospital</b><br>Name of the consultant responsible for deceased as a patient _____ |

The doctor has given you this form so that you can arrange for the death to be registered. Once the death is registered, the local registrar will keep this form, but can advise you what other documents you may need and can issue extracts of the entry in the register of deaths

### **Who should tell the local registrar about the death**

One of the following people must go to the registration office and tell the local registrar about the death.

- Any relative of the deceased, or
- any person present when the person died, or
- the deceased's executor or other legal representative, or
- the occupier of the property where the person died,

or if there is no such person,

- anyone else who knows the information to be registered.

### **Where to take the form**

In Scotland, a death may be registered

- either in the registration district where the person died
- or in the registration district where the deceased lived (the district of "usual residence") if that was in Scotland.

Usual residence means the deceased's permanent home, not at an address such as a holiday address where he or she may have been staying at the time of death.

If you need advice about what to do with the form, please telephone any local registrar in Scotland (see 'Registration of Births, Death and Marriages' in the telephone book).
